# Supplementary material for: Association of Chrononutrition Indices with Anthropometric Parameters, Academic Performance, and Psychoemotional State of Adolescents: A Cross-Sectional Study
Source: MDPI journal article supplement (doi:10.3390/nu15214521), 2023-10-25
Supplement: s1 [file s1]

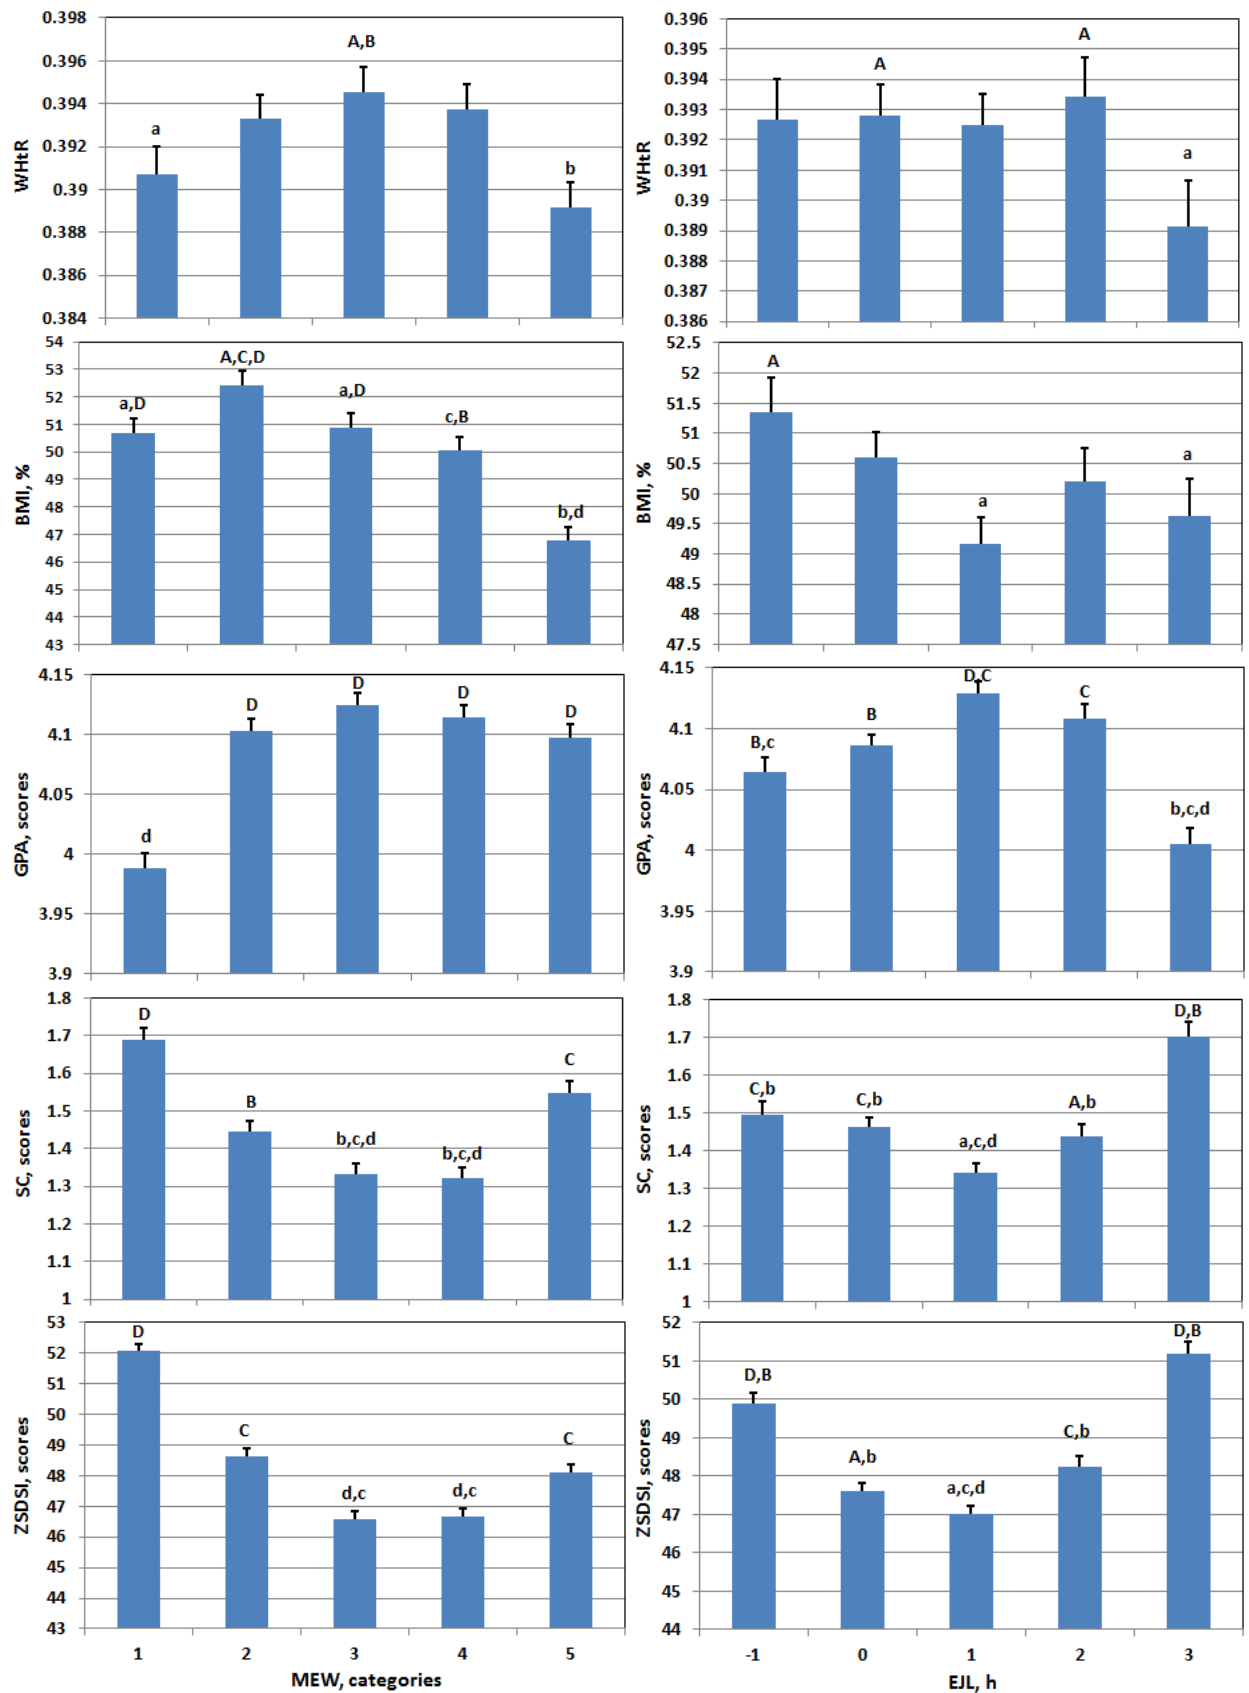

**Figure S1.** The association of meal timing characteristics with the anthropometric, cognitive, and psychoemotional state of schoolchildren.

MEW: mean weekly eating window; EIJL: eating jetlag; EPFc: eating mid-phase on free days corrected for week/free days variability; NE: night eating; WHtR: waist-to-height ratio; BMI, %: body mass index, percentiles; GPA: academic performance; SC: symptom counts of food addiction; ZSDSI: depression. Differences between group indicated by letters are significant (Student test: A>a,  $p < 0.05$ ; B>b,  $p < 0.01$ ; C>c,  $p < 0.001$ ; D>d, F>f, G>g, H>h,  $p < 0.0001$ ; E>e,  $p < 0.00001$ )

Figure S1 Continue

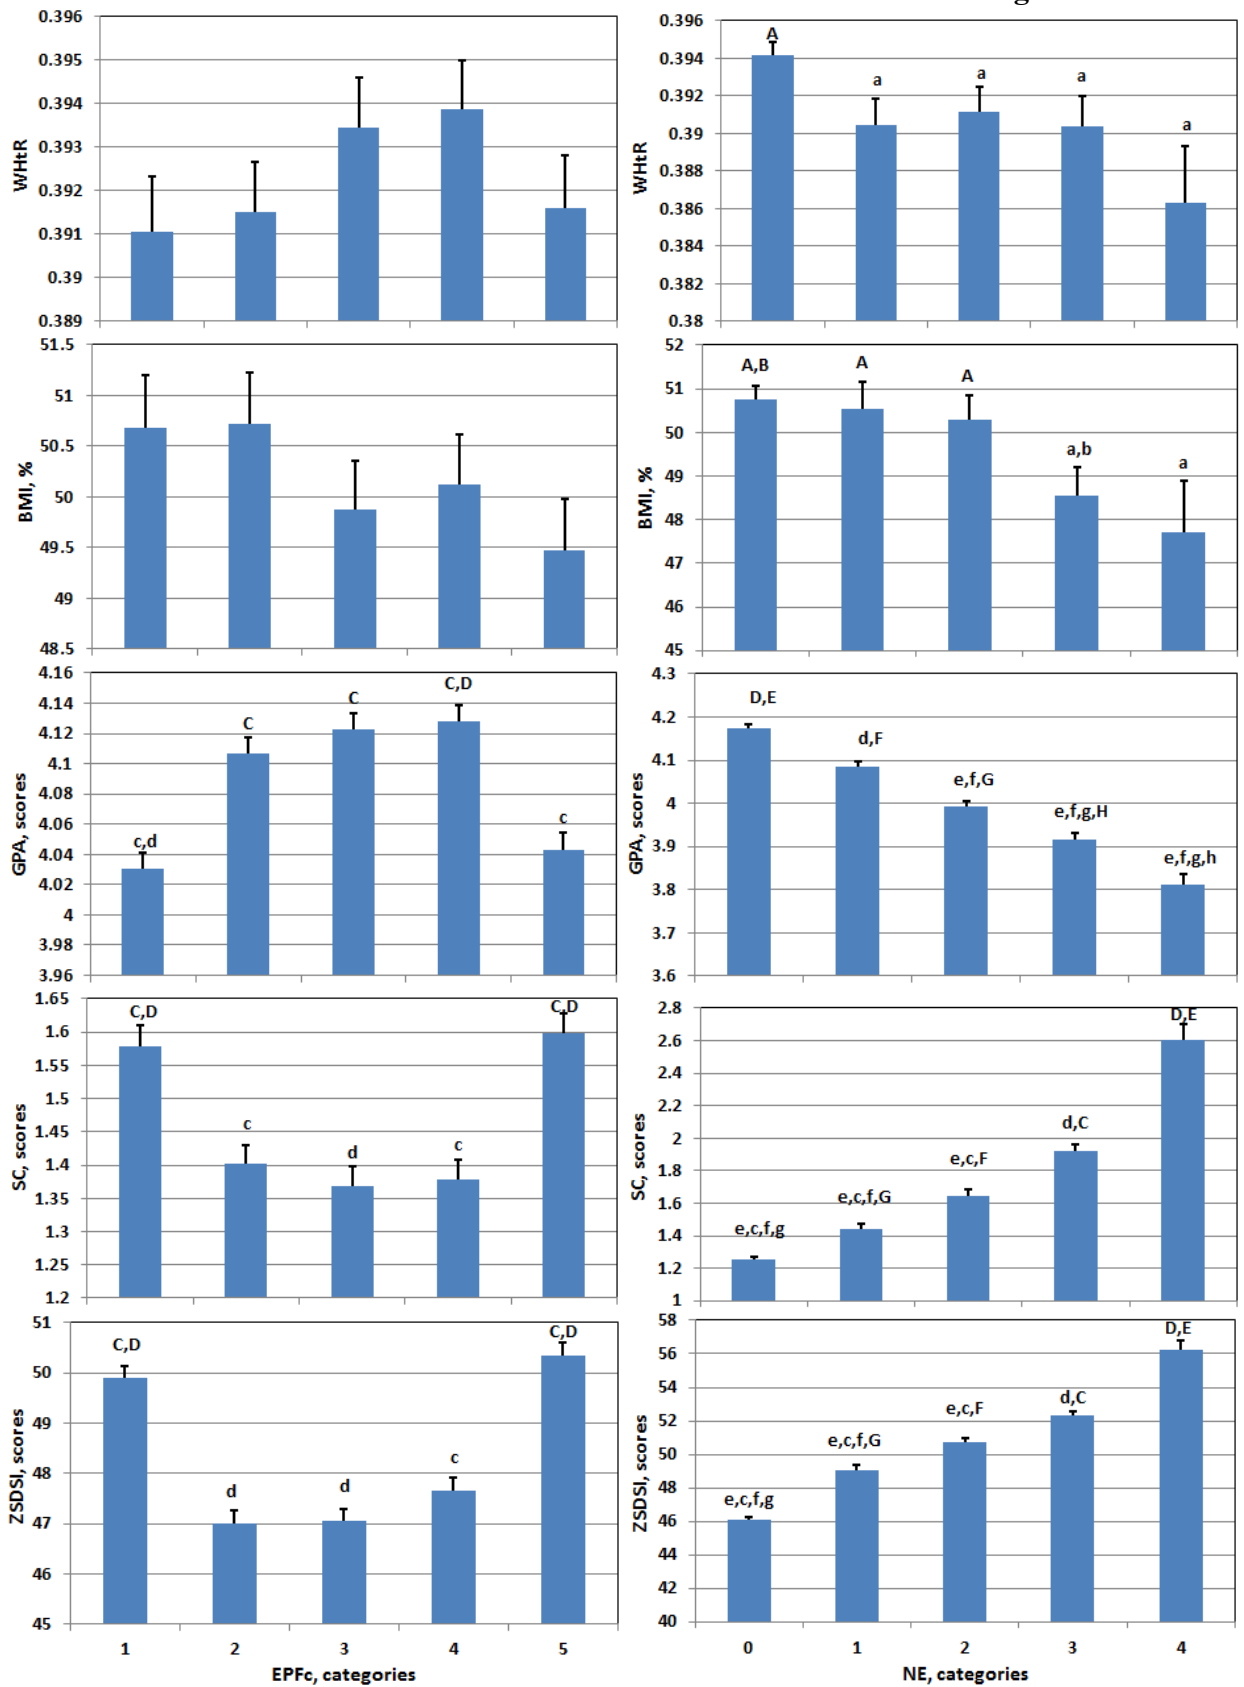

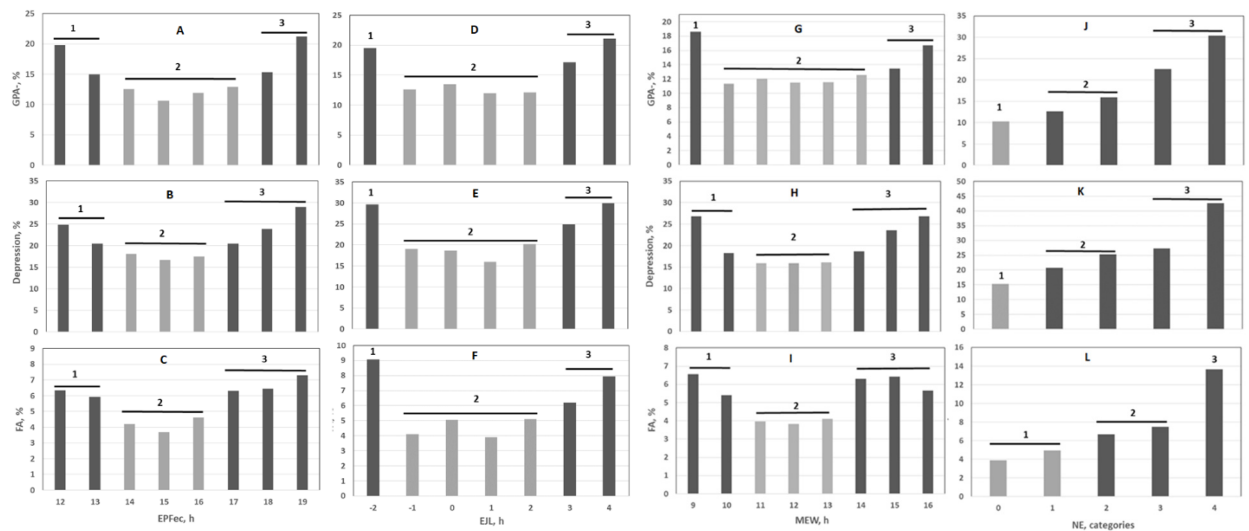

**Figure S2.** The association of meal timing characteristics with the categorical anthropometric, cognitive, and psychoemotional state of schoolchildren. The minimum values of indicators of academic performance (percentage of students with "satisfactory" academic performance, GPA<sub>L</sub>, %), depression (%) and food addiction (FA, %) are highlighted in light.

**Table S1.** The association of meal timing characteristics with the categorical anthropometric, cognitive, and psychoemotional state of schoolchildren.

|       |            | 1/2   |       |       |          |       |           | 3/2      |       |           |
|-------|------------|-------|-------|-------|----------|-------|-----------|----------|-------|-----------|
|       |            | 1     | 2     | 3     | $\chi^2$ | P     | $\varphi$ | $\chi^2$ | P     | $\varphi$ |
| EPFec | GPA-       | 17.79 | 11.89 | 18.02 | 59.13    | 0.000 | 0.075     | 44.86    | 0.000 | 0.069     |
|       | Depression | 23.05 | 17.31 | 23.47 | 37.29    | 0.000 | 0.065     | 48.03    | 0.000 | 0.072     |
|       | FA         | 6.17  | 4.14  | 6.59  | 15.60    | 0.000 | 0.042     | 24.85    | 0.000 | 0.052     |
| EJL   | GPA-       | 19.47 | 12.65 | 18.93 | 26.74    | 0.000 | 0.051     | 45.72    | 0.000 | 0.064     |
|       | Depression | 29.60 | 18.17 | 27.17 | 54.28    | 0.000 | 0.073     | 67.88    | 0.000 | 0.079     |
|       | FA         | 9.05  | 4.59  | 6.98  | 26.68    | 0.000 | 0.052     | 15.51    | 0.000 | 0.038     |
| MEW   | GPA-       | 18.61 | 11.75 | 14.56 | 94.43    | 0.000 | 0.091     | 4.34     | 0.050 | 0.023     |
|       | Depression | 24.57 | 15.99 | 21.07 | 114.44   | 0.000 | 0.107     | 21.85    | 0.000 | 0.056     |
|       | FA         | 6.25  | 3.96  | 6.25  | 26.93    | 0.000 | 0.052     | 14.35    | 0.000 | 0.045     |
|       |            | 1     | 2     | 3     | 2/1      |       |           | 3/1      |       |           |
| NE    | GPA-       | 10.30 | 14.45 | 24.58 | 37.34    | 0.000 | 0.061     | 262.42   | 0.000 | 0.175     |
|       | Depression | 15.26 | 23.21 | 31.17 | 94.74    | 0.000 | 0.098     | 241.03   | 0.000 | 0.170     |
|       | FA         | 4.07  | 7.02  | 13.65 | 42.21    | 0.000 | 0.061     | 93.77    | 0.000 | 0.106     |

The figures indicate groups of indicators expressed as a percentage, as in Figure S2.

**A chi squared-test** was used for analysis of the association of meal timing characteristics with categorical variables (Female, %, BMI categories, %, ZSDSI categories, %, and FA, %). Cramer's V ( $\phi$ ) was used as a measure of effect size for categorical variables.
